# Supplementary material for: History of malaria control in Rwanda: implications for future elimination in Rwanda and other malaria-endemic countries
Source: Springer Nature journal article supplement (doi:10.1186/s12936-020-03407-1), 2020-10-07
Supplement: MOESM2 [file 18458928]

## Period 1: First documentation of malaria to the development of the GMEP (1900–1954)

- 1917 ● First documentation of malaria cases
- 1920–1930 ● Report of increase of malaria cases
- 1930–1940 ● Use of quinine for malaria treatment; Parasite and vector surveys by the Medical Laboratory of Ruanda-Urundi
- 1946 ● New malaria control initiatives with a focus on environmental management
- 1949–1951 ● DDT spraying campaigns in Butare (prior to GMEP)
- 1952–1954 ● DDT spraying campaigns expansion to Usumbura & Bubanza in 1952 and Shangungu in 1954 (prior to GMEP)

## Period 2: The Global Malaria Eradication Program (GMEP) in Rwanda (1955–1969)

- 1955–1960 ● GMEP with DDT targeted spraying campaigns in Ruanda-Urundi
- 1962 ● First malaria stratification by Meyus; End of GMEP activities in Rwanda; Severe Epidemics of malaria in Byumba and Ruhengeri
- 1969 ● End of GMEP

## Period 3: Post GMEP to the Genocide against the Tutsi (1970–1994)

- 1980 ● Treatment standardization; Start of drug resistance monitoring system
- 1981 ● Report of earliest therapeutic failures of chloroquine treatment for *P. falciparum* in Rwanda
- 1982 ● Updated malaria stratification by Yvorry Canon
- 1985 ● Report of amodiaquine and sulfadoxine pyrimethamine drug resistance
- 1989 ● Establishment of the National Malaria Control Program
- 1994 ● 1994 Genocide against the Tutsi killing > 1 million people followed by malaria epidemics

## Period 4: Reestablishment of malaria control (1995–2005)

- 1995 ● Development of first malaria policy
- 1995 ● Spike in malaria incidence plus massive population movement (estimated 1.4 Million internally displaced and 1.5 Millions returnees)
- 1996 ● Introduction of mosquito nets in the private sector
- 1998–2004 ● Severe epidemics of malaria

- 1999–2000 ● Community based health insurance (CBHI) pilot in 3 districts
- 2000 ● Pilot distribution of 40000 mosquito nets for project evaluation in Kayonza
- 2000 ● Comprehensive social and health reforms with establishment of CBHI and initial decentralization of public health
- 2000 ● Introduction of CQ weekly doses for prevention of malaria in pregnancy + iron supplementation in standard ANC care
- 2001 ● Adoption of AQ+SP for malaria treatment; Introduction of Performance based Financing (PBF) and Ubudehe programme
- 2004 ● HBM pilot in 6 districts with AQ+SP; Roll out of PBF at health facilities; Scale up of Ubudehe programme countrywide
- 2005 ● Start of GFATM support for malaria; Scale up of IPTp and LLINs for routine distribution (EPI and ANC)

## Period 5: Current malaria response in Rwanda (2006–2018)

- 2006 ● First countrywide mass LLIN campaign for children under five, National rollout of CBHI introduction of ACTs; Reform of public health decentralization
- 2007 ● Start of PMI support in Rwanda; Scale up of HBM with ACTs to 9 districts; IRS using pyrethroids in 3 districts
- 2008 ● Introduction of RDTs at community level Scale up of ACTs countrywide, including in the private sector; Discontinuation of IPTp
- 2009 ● Start of iCCM implementation (Malaria, pneumonia, diarrhea); First countrywide mass LLIN campaign for all ages and households
- 2010 ● Universal coverage of LLINs and malaria diagnostic achieved
- 2011 ● IVM policy; Scale up of IRS using pyrethroids in 5 districts; Rollout of PBF at the community level for CHWs
- 2012 ● Distribution of substandard LLINs
- 2013–2014 ● Replacement of substandard LLINs; Targeted LLINs in high malaria burden districts and Switch to carbamates for IRS
- 2014 ● Switch to organophosphates for IRS; Targeted LLINs in high malaria burden districts
- 2015 ● Development of malaria contingency plan; Targeted LLINs in high malaria burden districts
- 2015 ● Pilot use of biological larviciding
- 2016 ● Switch to organophosphate for IRS and expansion of community case management of malaria to all age groups (RDTs and ACTs)
