# Supplementary material for: History of malaria control in Rwanda: implications for future elimination in Rwanda and other malaria-endemic countries
Source: Springer Nature journal article supplement (doi:10.1186/s12936-020-03407-1), 2020-10-07
Supplement: MOESM3 [file 18458928]

**Figure 1: Malaria cases and deaths, 1990–2018**

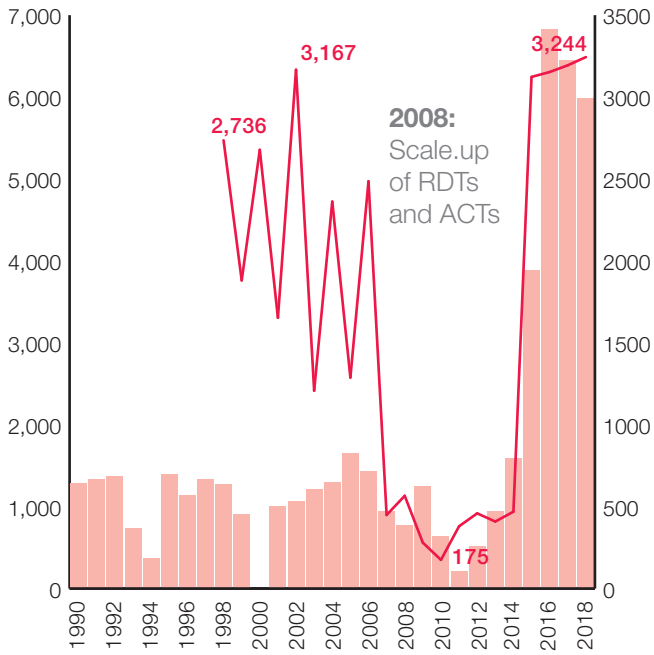

**Presumed and confirmed malaria cases, in thousands** (HMIS & WHO WMR) (left y-axis)  
**Reported malaria deaths** (WHO WMR) (right y-axis)

**Figure 2: ITN/LLIN ownership and use, 2005–2018**

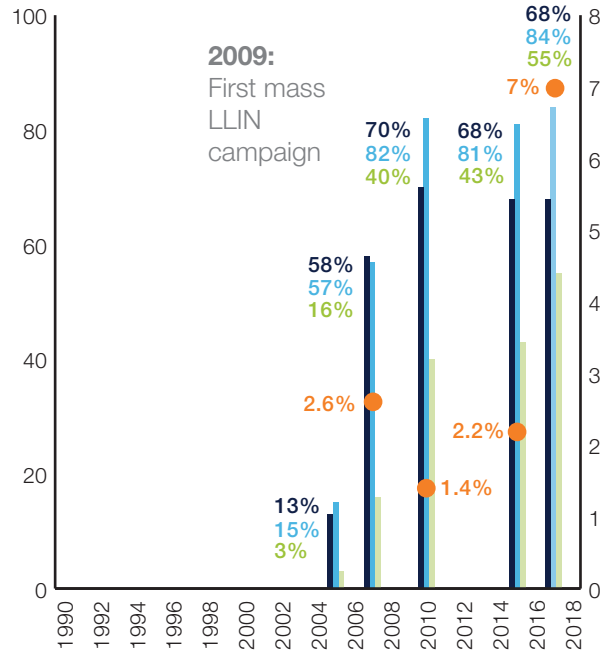

**ITN usage** (% of children under five who slept under an ITN the previous night) (DHS) (left axis)  
**ITN ownership** (% households with at least one ITN) (DHS) (left axis)  
**ITN ownership** (% households with at least one ITN for every two people) (DHS) (left axis)  
**% prevalence of malaria in children 6–59 months** (DHS) (right axis)

**Figure 3: Community based health insurance coverage, 2002–2018**

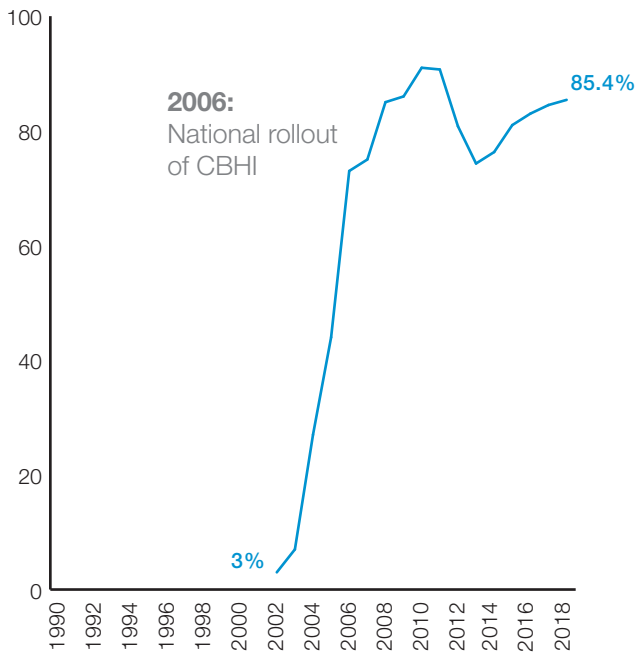

**Coverage of community-based health insurance (CBHI) (%)** (MoH)

**Figure 4: Malaria funding, 2005–2018**

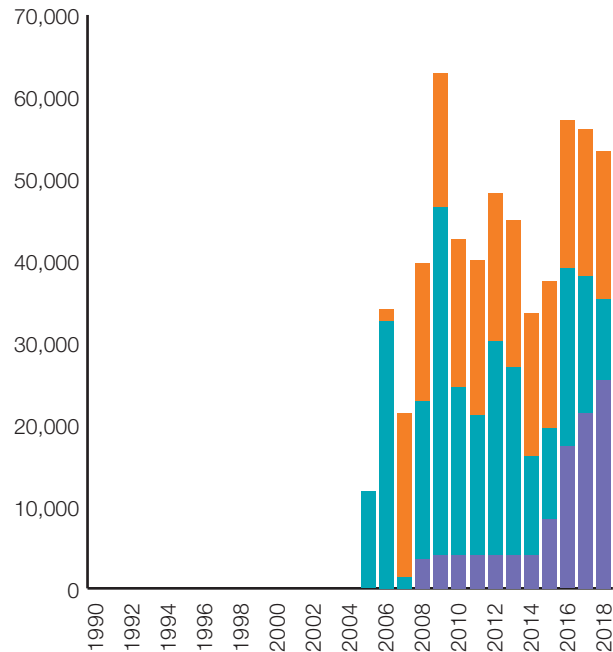

**Domestic government malaria funding in millions \$USD**  
**Global Fund malaria funding in millions \$USD** (Global Fund Data Explorer)  
**US President's Malaria Initiative malaria funding in millions \$USD** (PMI Resource Library)
